# Supplementary material for: Metal–organic framework based mixed matrix membranes: a solution for highly efficient CO2capture?
Source: Royal Society of Chemistry journal article supplement (doi:10.1039/c4cs00437j), 2015-01-01
Supplement: c4cs00437j1.pdf [file c4cs00437j1.pdf]

Supplementary Information to

## **Metal Organic Framework based Mixed Matrix Membranes: a solution for highly efficient CO<sub>2</sub> capture?**

Beatriz Seoane<sup>1</sup>, Joaquin Coronas<sup>2a</sup>, Ignacio Gascon<sup>2b</sup>, Miren Etxeberria Benavides<sup>3</sup>, Oğuz Karvan<sup>3</sup>, Jürgen Caro<sup>4</sup>, Freek Kapteijn<sup>1</sup> and Jorge Gascon<sup>1,\*</sup>

<sup>1</sup> Catalysis Engineering, ChemE, Delft University of Technology, Julianalaan 136, 2628 BL Delft, The Netherlands.

<sup>2a</sup> Chemical and Environmental Engineering Department and Instituto de Nanociencia de Aragón (INA), Universidad de Zaragoza, 50018 Zaragoza, Spain.

<sup>2b</sup> Physical Chemistry Department and Instituto de Nanociencia de Aragón (INA), Universidad de Zaragoza, 50018 Zaragoza, Spain.

<sup>3</sup> Tecnalia, Energy and Environmental Division, Parque Tecnológico de San Sebastián, Mikeletegi Pasealekua 2, E-20009 Donostia-San Sebastián, Spain.

<sup>4</sup> Institut für Physikalische Chemie und Elektrochemie, Leibniz Universität Hannover, Callinstr. 22, D-30167 Hannover, Germany.

\*Correspondence to: [j.gascon@tudelft.nl](mailto:j.gascon@tudelft.nl)

## List of acronyms and abbreviations

|                       |                                                                   |
|-----------------------|-------------------------------------------------------------------|
| $\mu$ -BPA            | 1,2-Bis(4-pyridyl)ethane                                          |
| $\mu$ -BPP            | 1,3-Bis(4-pyridyl)propane                                         |
| 1,4-BDC (or BDC)      | 1,4-Benzenedicarboxylate                                          |
| 2,6-NDC               | 2,6-Naphthalenedicarboxylate                                      |
| 2-amBzIM              | 2-Aminobenzimidazole                                              |
| 2MI                   | 2-Methylimidazole                                                 |
| 4,4' BPDC             | 4,4'-Biphenyl dicarboxylate                                       |
| 4,4'-BPY              | 4,4'-Bipyridine                                                   |
| 4,4'-SDA              | Bis(4-aminophenyl) sulphide                                       |
| 4MPD                  | 2,3,5,6-Tetramethyl-1,4-phenylenediamine                          |
| 6FDA                  | 4,4'-(Hexafluoroisopropylidene)diphthalic anhydride               |
| 6F-PBI                | Hexafluoroisopropylidene-containing polybenzimidazole             |
| APTMS                 | Bis(3-aminopropyl)tetramethyldisiloxane                           |
| B                     | Bulk crystals                                                     |
| BTC                   | 1,3,5-Benzenetricarboxylate                                       |
| BuI                   | 5-Tert-butylisophthalic acid                                      |
| BzIM                  | Benzimidazole                                                     |
| CCS                   | Carbon Capture and Storage                                        |
| CLC                   | Chemical looping combustion                                       |
| CMS                   | Carbon molecular sieves                                           |
| DABA                  | 3,5-Diaminobenzoic acid                                           |
| DABCO                 | 1,4-Diazabicyclo[2.2.2]octane                                     |
| DAM (or TMPDA)        | 2,4,6-Trimethyl- <i>m</i> -phenylenediamine                       |
| DBzPBI                | PBI after N-substitution reaction with 4-tert-butylbenzyl bromide |
| DEA                   | Diethanolamine                                                    |
| DMF                   | Dimethylformamide                                                 |
| DMPBI                 | PBI after N substitution reaction with methyl iodide              |
| DSDA                  | 3,3',4,4'-Diphenylsulfone tetracarboxylic dianhydride             |
| ETS                   | Emissions Trading System                                          |
| Glu                   | Glutarate                                                         |
| GPU                   | Gas permeance units                                               |
| H <sub>2</sub> hfipbb | 4,4'-Hexafluoroisopropylidene bis(benzoic acid)                   |
| HFb                   | Hollow fiber                                                      |
| HFS                   | Hexafluorosilicate                                                |
| HHV                   | Higher heating value                                              |
| HSP                   | Hansen solubility parameters                                      |
| IAST                  | Ideal adsorbed solution theory                                    |
| IGCC                  | Integrated gasification combined cycle                            |
| IPA                   | Isopropanol                                                       |
| IPCC                  | Intergovernmental Panel on Climate Change                         |
| LANL                  | Los Alamos National Laboratory                                    |

|                      |                                                                     |
|----------------------|---------------------------------------------------------------------|
| LB                   | Langmuir-Blodgett                                                   |
| LCOE                 | Levelized Cost of Energy                                            |
| M <sup>4</sup>       | MOF-based mixed matrix membrane                                     |
| M <sup>4</sup> -HFb  | MOF-based mixed matrix membrane in asymmetric hollow fiber geometry |
| MEA                  | Monoethanolamine                                                    |
| MM-HFbM              | Mixed matrix membranes in asymmetric hollow fiber geometry          |
| MMM                  | Mixed-matrix membrane                                               |
| MOF                  | Metal organic framework                                             |
| MS                   | Maxwell-Stefan                                                      |
| MSS                  | Mesoporous silica spheres                                           |
| MTR                  | Membrane Technology and Research, Inc.                              |
| Nc                   | Nanoparticle crystals                                               |
| NH <sub>2</sub> -BDC | 2-Aminoterephthalate                                                |
| Ns                   | Nanosheets                                                          |
| ODA                  | 4,4'-Oxydianiline                                                   |
| ODPA                 | 4,4'-Oxydiphthalicanhydride                                         |
| PA                   | Polyamide                                                           |
| PAET                 | Poly(3-acetoxyethylthiophene)                                       |
| PAI                  | Polyamide-imide                                                     |
| PBI                  | Polybenzimidazole                                                   |
| PC                   | Pulverized coal                                                     |
| PDMS                 | Polydimethylsiloxane                                                |
| PEI                  | Polyethylenimine                                                    |
| PES                  | Polyethersulfone                                                    |
| PI                   | Polyimide                                                           |
| PIM                  | Polymer of intrinsic microporosity                                  |
| PLLA                 | Poly(L-lactic acid)                                                 |
| PMDA                 | Pyromellitic dianhydride                                            |
| PMMA                 | Poly(methyl methacrylate)                                           |
| PMP                  | Poly (4-methyl-1-pentyne)                                           |
| PMPS                 | Polymethylphenylsiloxane                                            |
| POZ                  | Polyoxazoline                                                       |
| PPEES                | Poly-(1,4-phenylene ether-ether-sulfone)                            |
| PPO                  | Poly(2,6-dimethyl-1,4-phenylene oxide)                              |
| PSF                  | Polysulfone                                                         |
| PTMSP                | Poly[1-(trimethylsilyl)-1-propyne]                                  |
| PVAc                 | Poly(vinyl acetate)                                                 |
| SET-plan             | European Strategic Energy Technology Plan                           |
| TED                  | Triethylenediamine                                                  |
| TPX                  | Polymethylpentene                                                   |
| XLPEO                | Cross-linked polyethylene oxide                                     |
| ZEP                  | Zero Emission Fossil Fuel Power Plants                              |

**List of symbols**

|                  |                                                                                 |                                        |
|------------------|---------------------------------------------------------------------------------|----------------------------------------|
| A                | Membrane area                                                                   | $m^2$                                  |
| $b_i$            | Affinity constant of specie i                                                   | $Pa^{-1}$                              |
| $C_i$            | Concentration of component i                                                    | $mol/m^3$                              |
| $C_i^{sat}$      | Langmuir capacity constant of specie i                                          | $mol/m^3$                              |
| $D_f$            | Diffusivity of specie i in the filler                                           | $m^2/s$                                |
| $D_i$            | Diffusion coefficient of component i                                            | $m^2/s$                                |
| $\mathfrak{D}_i$ | Maxwell-Stefan diffusivity of component i                                       | $m^2/s$                                |
| $D_i^{eff}$      | 'Effective' diffusion coefficient of component i                                | $m^2/s$                                |
| $D_i^H$          | Diffusivity of specie i in the Henry environment                                | $m^2/s$                                |
| $D_i^L$          | Diffusivity of specie i in the Langmuir environment                             | $m^2/s$                                |
| $D_{Kn,i}$       | Knudsen diffusion coefficient of component i                                    | $m^2/s$                                |
| $D_m$            | Diffusivity of specie i in the matrix                                           | $m^2/s$                                |
| $d_o$            | Pore diameter                                                                   | m                                      |
| $D_{self,i}$     | Self-diffusivity of component i                                                 | $m^2/s$                                |
| F                | Correction factor                                                               | -                                      |
| $f_i$            | Fugacity of component i                                                         | Pa                                     |
| K                | Interfacial equilibrium constant or partition coefficient                       | -                                      |
| $K_i$            | Langmuir isotherm adsorption constant                                           | $Pa^{-1}$                              |
| $K_i^H$          | Henry adsorption coefficient of specie i                                        | $mol/(Pa \cdot m^3)$                   |
| L                | Membrane thickness                                                              | m                                      |
| $M_i$            | Molecular weight of component i                                                 | kg/mol                                 |
| $N_c$            | Molar flux of a gas species in the continuous phase of a MMM                    | $mol/(m^2 \cdot s)$                    |
| $N_d$            | Molar flux of a gas species in the dispersed phase of a MMM                     | $mol/(m^2 \cdot s)$                    |
| $N_{eff}$        | Effective molar flux of a gas species in a MMM                                  | $mol/(m^2 \cdot s)$                    |
| $N_i$            | Molar flux of component i                                                       | $mol/(m^2 \cdot s)$                    |
| $P_f$            | Permeability of specie i in the filler                                          | $(mol \cdot m)/(m^2 \cdot s \cdot Pa)$ |
| $P_i$            | Permeability coefficient of component i                                         | $(mol \cdot m)/(m^2 \cdot s \cdot Pa)$ |
| $p_i$            | Partial pressure of component i                                                 | Pa                                     |
| $P_m$            | Permeability of specie i in the matrix                                          | $(mol \cdot m)/(m^2 \cdot s \cdot Pa)$ |
| $q_i$            | Adsorbed amount or loading of component i in a porous material                  | mol/kg                                 |
| $q_i^{sat}$      | Maxim adsorbed amount or loading of component i in a porous solid at saturation | mol/kg                                 |
| R                | Gas constant                                                                    | $J/(mol \cdot K)$                      |
| $R_a$            | Distance between Hansen parameters                                              | $Pa^{0.5}$                             |
| $S_{ij}$         | Ideal selectivity                                                               | -                                      |
| T                | Temperature                                                                     | K                                      |
| $X_i$            | Mole fractions of component i                                                   | -                                      |
| $\alpha_{ij}$    | Separation factor                                                               | -                                      |
| $\Gamma_{ii}$    | Thermodynamic correction factor                                                 | -                                      |

|              |                                                                                                                |                   |
|--------------|----------------------------------------------------------------------------------------------------------------|-------------------|
| $\delta_D$   | Hansen solubility parameter to quantitatively describe the dispersion or London interaction between two phases | $\text{Pa}^{0.5}$ |
| $\delta_H$   | Hansen solubility parameter to quantitatively describe the hydrogen bonds between two phases                   | $\text{Pa}^{0.5}$ |
| $\delta_P$   | Hansen solubility parameter to quantitatively describe the polar interaction between two phases                | $\text{Pa}^{0.5}$ |
| $\Delta p_i$ | Partial pressure difference for component i across the membrane                                                | Pa                |
| E            | Porosity                                                                                                       | -                 |
| $\theta_i$   | Fractional coverage of the surface in a porous material                                                        | -                 |
| P            | Density                                                                                                        | $\text{kg/m}^3$   |
| T            | Tortuosity                                                                                                     | -                 |
| $\phi_d$     | Volume fraction of the dispersed phase in a MMM                                                                | -                 |

**Table 2:** Overview of the reported MOF-containing MMMs for gas separation in chronological order

| M <sup>4</sup>                                                                                                    |           | wt.% loading<br>(best MMM<br>performance) | Example (best performance)           |                                                        |                                      |                                                       |                                     |                                                       | Type of analysis                                                                                                                                                  | Operation<br>conditions<br>(optimal value) |   |
|-------------------------------------------------------------------------------------------------------------------|-----------|-------------------------------------------|--------------------------------------|--------------------------------------------------------|--------------------------------------|-------------------------------------------------------|-------------------------------------|-------------------------------------------------------|-------------------------------------------------------------------------------------------------------------------------------------------------------------------|--------------------------------------------|---|
| MOF                                                                                                               | Polymer   |                                           | <i>P</i> CO <sub>2</sub><br>(Barrer) | CO <sub>2</sub> /CH <sub>4</sub><br>selectivity<br>(-) | <i>P</i> CO <sub>2</sub><br>(Barrer) | CO <sub>2</sub> /N <sub>2</sub><br>selectivity<br>(-) | <i>P</i> H <sub>2</sub><br>(Barrer) | H <sub>2</sub> /CO <sub>2</sub><br>selectivity<br>(-) | <i>T</i> (°C)                                                                                                                                                     | $\Delta P$<br>(bar)                        |   |
| Cu 4,4'-BPDC-TED                                                                                                  | PAET      | 10-30 (30)                                | 1.4-(0.7)                            | 18.0-(3.2)                                             | -                                    | -                                                     | -                                   | -                                                     | Single gas CO <sub>2</sub> , O <sub>2</sub> , N <sub>2</sub> , CH <sub>4</sub>                                                                                    | 25                                         | 2 |
|                                                                                                                   |           |                                           | -                                    | -                                                      | -                                    | -                                                     | -                                   | -                                                     | Gas mixture CH <sub>4</sub> /CO <sub>2</sub> (10:90)                                                                                                              |                                            |   |
| [Cu <sub>2</sub> (PF <sub>6</sub> )(NO <sub>3</sub> )(4,4'-bpy) <sub>4</sub> ]2PF <sub>6</sub> ·2H <sub>2</sub> O | PSF       | 2.5-5 (5)                                 | -                                    | -                                                      | -                                    | -                                                     | -                                   | -                                                     | Single gas He, H <sub>2</sub> , O <sub>2</sub> , N <sub>2</sub> , CH <sub>4</sub>                                                                                 | 35                                         | 1 |
| [Zn <sub>2</sub> (1,4-bdc) <sub>2</sub> (dabco)]·4DMF·0.5H <sub>2</sub> O                                         | PAI       | 30                                        | 46.7-(109)                           | 49.7-(40.4)                                            | 46.7-(109)                           | 28.3-(24.6)                                           | 79.2-(191)                          | 1.7-(1.8)                                             | Single gas                                                                                                                                                        | -                                          | - |
|                                                                                                                   | 6FDA-4MPD |                                           | 1000-(3330)                          | 23.0-(19.6)                                            | 1000-(3330)                          | 21.4-(19.1)                                           | 743-(1890)                          | 0.7-(0.6)                                             |                                                                                                                                                                   |                                            |   |
|                                                                                                                   | PDMS      |                                           | 2830-(4010)                          | 3.4-(3.7)                                              | 2830-(4010)                          | 10.5-(10.0)                                           | 673-(955)                           | 0.2-(0.2)                                             |                                                                                                                                                                   |                                            |   |
| HKUST-1                                                                                                           | PDMS      | 10-40(30, 10, 40)                         | 2500-(2900)*                         | 3.1-(3.6)*                                             | 2500-(3050)*                         | 7.0-(8.9)*                                            | 550-(900)*                          | 0.2-(0.4)*                                            | Single gas H <sub>2</sub> , CO <sub>2</sub> , O <sub>2</sub> , N <sub>2</sub> , CH <sub>4</sub>                                                                   | -                                          | - |
|                                                                                                                   | PSF       | 5-10 (5, 10)                              | 6.5-(7.5)*                           | 18.0-(21.5)*                                           | 6.5-(7.5)*                           | 20.0-(25.0)*                                          | 9.8-(15.0)*                         | 1.5-(1.9)*                                            |                                                                                                                                                                   |                                            |   |
| Mn(HCOO) <sub>2</sub>                                                                                             | PSF       | 5-10 (10, 5)                              | 6.5-(7.0)*                           | 18.0-(9.5)*                                            | 6.5-(7.0)*                           | 20.0-(25.5)*                                          | 9.5-(10.5)*                         | 1.5-(1.6)*                                            | Single gas H <sub>2</sub> , CO <sub>2</sub> , O <sub>2</sub> , N <sub>2</sub> , CH <sub>4</sub>                                                                   | -                                          | - |
|                                                                                                                   |           | 10-40 (20, 30)                            | 7.3-(9.9)                            | 34.7-(27.6)                                            | 7.3-(9.9)                            | 33.1-(31.9)                                           | 17.5-(20.3)                         | 2.4-(2.0)                                             |                                                                                                                                                                   |                                            |   |
| Cu-4,4'-BPY-HFS                                                                                                   | Matrimid® | 10-40 (20, 30)                            | 7.3-(9.9)                            | 34.7-(27.6)                                            | 7.3-(9.9)                            | 33.1-(31.9)                                           | 17.5-(20.3)                         | 2.4-(2.0)                                             | Single gas H <sub>2</sub> , CO <sub>2</sub> , O <sub>2</sub> , N <sub>2</sub> , CH <sub>4</sub>                                                                   | 35                                         | 2 |
|                                                                                                                   |           | 20                                        | -                                    | 36.3-(20.5)                                            | -                                    | -                                                     | -                                   | 2.6-(2.6)                                             | Gas mixture<br>H <sub>2</sub> /CO <sub>2</sub> (50:50, 75:25)<br>CO <sub>2</sub> /CH <sub>4</sub> (50:50, 10:90)<br>CH <sub>4</sub> /N <sub>2</sub> (94:6, 50:50) |                                            |   |
| IRMOF-1                                                                                                           | Matrimid® | 20                                        | 10.0-(38.8)                          | 28.2-(29.2)                                            | -                                    | -                                                     | 33.1-(114.9)                        | 3.3-(3.0)                                             | Single gas H <sub>2</sub> , CO <sub>2</sub> , CH <sub>4</sub>                                                                                                     | 50                                         | 7 |
|                                                                                                                   | Ultem®    | 10, 20 (20)                               | 2.0-(3.0)                            | 30.3-(26.3)                                            | -                                    | -                                                     | 11.2-(16.9)                         | 5.7-(5.7)                                             |                                                                                                                                                                   |                                            |   |
| HKUST-1                                                                                                           | Matrimid® | 30                                        | 10.0-(22.1)                          | 28.2-(29.8)                                            | -                                    | -                                                     | 33.1-(66.9)                         | 3.3-(3.0)                                             | Single gas H <sub>2</sub> , CO <sub>2</sub> , O <sub>2</sub> , N <sub>2</sub> , CH <sub>4</sub>                                                                   | 35                                         | 2 |
| MOF-5                                                                                                             | Matrimid® | 10-30 (30)                                | 9.0-(20.2)                           | 41.7-(44.7)                                            | 9.0-(20.2)                           | 36.0-(38.8)                                           | 24.4-(53.8)                         | 2.7-(2.7)                                             | Single gas H <sub>2</sub> , CO <sub>2</sub> , O <sub>2</sub> , N <sub>2</sub> , CH <sub>4</sub>                                                                   | 35                                         | 2 |

|                             |              |                       |                           |                  |                           |              |                 |             |                                                                                                                                                                                                        |                                              |                                         |
|-----------------------------|--------------|-----------------------|---------------------------|------------------|---------------------------|--------------|-----------------|-------------|--------------------------------------------------------------------------------------------------------------------------------------------------------------------------------------------------------|----------------------------------------------|-----------------------------------------|
|                             |              | 30                    | -                         | 38.0-(29.0)      | -                         | -            | -               | 2.3-(2.3)   | Gas mixture<br>H <sub>2</sub> /CO <sub>2</sub> (75:25, <u>50:50</u> , 25:75)<br>CH <sub>4</sub> /N <sub>2</sub> (94:6, 50:50, 25:75)<br>CO <sub>2</sub> /CH <sub>4</sub> (10:90, <u>50:50</u> , 25:75) |                                              |                                         |
| ZIF-8                       | PPEES        | 10-30 (30)            | 6-(25)                    | -                | 6-(25)                    | -            | -               | -           | -                                                                                                                                                                                                      | 30                                           | 1, 2,<br>3, 5,<br>7, 10                 |
| Cu 1,4-BDC                  | PVAc         | 15                    | 2.4-(3.3)                 | 34.9-(40.4)      | 2.4-(3.3)                 | 32.1-(35.4)  | -               | -           | Single gas He, CO <sub>2</sub> , O <sub>2</sub> , N <sub>2</sub> , CH <sub>4</sub>                                                                                                                     | 35                                           | 4.5<br>(0.1<br>for<br>CO <sub>2</sub> ) |
| ZIF-8                       | Matrimid®    | 20-60 (50)            | 9.5-(4.7)                 | 39.7-<br>(124.9) | 9.5-(4.7)                 | 30.6-(26.2)  | 28.9-<br>(18.1) | 3.0-(3.8)   | Single gas H <sub>2</sub> , CO <sub>2</sub> , O <sub>2</sub> , N <sub>2</sub> , CH <sub>4</sub> ,<br>C <sub>3</sub> H <sub>8</sub>                                                                     | 25                                           | 2.7                                     |
|                             |              | 50-60 (50,<br>60)     | -                         | 42.1-(89.2)      | -                         | -            | -               | 2.6-(7.0)   | Gas mixture<br>H <sub>2</sub> /CO <sub>2</sub> (50:50)<br>CO <sub>2</sub> /CH <sub>4</sub> (10:90)                                                                                                     |                                              |                                         |
| HKUST-1                     | Matrimid®    | 10-30 (30)            | 10.0-<br>(17.5)*<br>(GPU) | 18.0-(24.0)*     | 11.0-<br>(18.5)*<br>(GPU) | 23.5-(24.5)* | -               | -           | Gas mixture<br>CO <sub>2</sub> /CH <sub>4</sub> (10:90, <u>35:65</u> , 75:25)<br>CO <sub>2</sub> /N <sub>2</sub> (10:90, <u>35:65</u> , 75:25)                                                         | 35                                           | 10                                      |
| HKUST-1                     | PMDA-<br>ODA | 3-6 (3, 6)            | 306.6-<br>(227.2)         | 12.0-(7.0)*      | 306.6-<br>(227.2)         | 8.0-(5.5)*   | 3066-<br>(4445) | 10.0-(27.8) | Single gas H <sub>2</sub> , CO <sub>2</sub> , O <sub>2</sub> , N <sub>2</sub> , CH <sub>4</sub>                                                                                                        | 25                                           | 10                                      |
| ZIF-90                      | Ultem®       |                       | 1.4-(2.9)*                | 38-(39)*         | -                         | -            | -               | -           | Single gas CO <sub>2</sub> , CH <sub>4</sub>                                                                                                                                                           | 35                                           | 4.5                                     |
|                             | Matrimid®    | 15                    | 7.5-<br>(10.5)*           | 34-(35)*         | -                         | -            | -               | -           |                                                                                                                                                                                                        |                                              |                                         |
|                             | 6FDA-<br>DAM |                       | 390-<br>(720)             | 24-(37)          | -                         | -            | -               | -           |                                                                                                                                                                                                        |                                              |                                         |
| ZIF-20                      | PSF          | 8                     | -                         | -                | -                         | -            | -               | -           | Gas mixture O <sub>2</sub> /N <sub>2</sub> (50:50)                                                                                                                                                     | 35                                           | 2                                       |
| NH <sub>2</sub> -MIL-53(Al) | PSF          | 8, 16, 25, 40<br>(25) | 2.0-(2.4)                 | 45-(117)         | -                         | -            | -               | -           | Gas mixture CO <sub>2</sub> /CH <sub>4</sub> (50:50)                                                                                                                                                   | -10, 35                                      | 1, 3,<br>5, 7,<br><u>10</u> , 13        |
| ZIF-7                       | PBI          | 10, 25, 50<br>(50)    | -                         | -                | -                         | -            | 3.7-<br>(26.2)  | 8.7-(14.9)  | Single gas H <sub>2</sub> , CO <sub>2</sub>                                                                                                                                                            | 35                                           | 3.5                                     |
|                             |              |                       |                           |                  |                           |              | 75-(440)*       | 8.5-(7.2)*  | Gas mixture H <sub>2</sub> /CO <sub>2</sub> (50:50)                                                                                                                                                    | 35, 60,<br>80,<br>120,<br>150,<br><u>180</u> | 7                                       |
| ZIF-8 + S1C                 | PSF          | 16+0, 8+8<br>(16+0)   | 4.6-<br>(12.1)            | 24.3-(19.8)      | 5.9-<br>(12.3)            | 24.6-(19.5)  | -               | -           | Gas mixture<br>CO <sub>2</sub> /CH <sub>4</sub> (50:50)<br>CO <sub>2</sub> /N <sub>2</sub> (50:50)                                                                                                     | 35                                           | 2                                       |

|                             |           |                                       |                           |              |                           |              |                          |           |                                                                                                                                                                    |                           |                             |
|-----------------------------|-----------|---------------------------------------|---------------------------|--------------|---------------------------|--------------|--------------------------|-----------|--------------------------------------------------------------------------------------------------------------------------------------------------------------------|---------------------------|-----------------------------|
| HKUST-1 + SIC               |           | 16+0, 8+8<br>(8+8)                    | 4.6-(4.9)                 | 24.3-(22.4)  | 5.9-(8.4)                 | 24.6-(38.0)  | -                        | -         | O <sub>2</sub> /N <sub>2</sub> (50:50)<br>H <sub>2</sub> /CH <sub>4</sub> (50:50)                                                                                  |                           |                             |
| HKUST-1                     |           |                                       | 10.0-<br>(17.5)*<br>(GPU) | 18.5-(23.0)* | 11.5-<br>(19.5)*<br>(GPU) | 18.0-(23.5)* | -                        | -         |                                                                                                                                                                    |                           |                             |
| ZIF-8                       | Matrimid® | 10, 20, 30<br>(30)                    | 10.0-<br>(22.5)*<br>(GPU) | 18.5-(19.5)* | 11.5-<br>(20.0)*<br>(GPU) | 18.0-(19.5)* | -                        | -         | Gas mixture<br>CO <sub>2</sub> /CH <sub>4</sub> (10:90, <u>35:65</u> , 75:25)<br>CO <sub>2</sub> /N <sub>2</sub> (10:90, <u>35:65</u> , 75:25)                     | 35                        | 10                          |
| MIL-53(Al)                  |           |                                       | 10.0-<br>(20.0)*<br>(GPU) | 18.5-(22.5)* | 11.5-<br>(20.0)*<br>(GPU) | 18.0-(23.0)* | -                        | -         |                                                                                                                                                                    |                           |                             |
| ZIF-8                       | PPEEs     | 10, 20, 30<br>(30)                    | 5.4-<br>(50.0)            | 22.9-(20.8)  | 5.4-<br>(50.0)            | 30.1-(24.5)  | 6.7-<br>(92.3)           | 1.3-(1.8) | Single gas<br>H <sub>2</sub> , CO <sub>2</sub> , O <sub>2</sub> , N <sub>2</sub> , CH <sub>4</sub> , C <sub>2</sub> H <sub>4</sub> , C <sub>2</sub> H <sub>6</sub> | 10, 20,<br>30, 40         | 1                           |
| ZIF-8                       | 6FDA-DAM  | 16.4, 28.7, 48<br>(48)                | -                         | -            | -                         | -            | -                        | -         | Single gas C <sub>3</sub> H <sub>6</sub> , C <sub>3</sub> H <sub>8</sub>                                                                                           |                           | 2                           |
| ZIF-8                       |           |                                       |                           |              |                           |              |                          |           | Gas mixture C <sub>3</sub> H <sub>6</sub> /C <sub>3</sub> H <sub>8</sub> (50:50)                                                                                   | 35                        | 1.4,<br>2.8,<br>4.1,<br>5.5 |
| MIL-101(Cr)                 |           | 8, 16, 24                             | -                         | -            | -                         | -            | -                        | -         |                                                                                                                                                                    |                           |                             |
| MOF-508a(Zn)                |           |                                       | -                         | -            | -                         | -            | -                        | -         |                                                                                                                                                                    |                           |                             |
| MIL-53(Al)                  | PSF       | 8                                     | -                         | -            | -                         | -            | -                        | -         | Single gas O <sub>2</sub> , N <sub>2</sub>                                                                                                                         | 30                        | 3                           |
| MIL-100(Fe)                 |           |                                       | -                         | -            | -                         | -            | -                        | -         |                                                                                                                                                                    |                           |                             |
| MIL-53(Al)                  |           | 25                                    | 14.5-<br>(21.0)*          | 48.0-(44.0)* | -                         | -            | -                        | -         | Single gas CO <sub>2</sub> , CH <sub>4</sub>                                                                                                                       |                           |                             |
| MIL-53(Al)                  | 6FDA-ODA  |                                       | 14.5-<br>(21.0)*          | 42.0-(42.5)* | -                         | -            | -                        | -         | Gas mixture CO <sub>2</sub> /CH <sub>4</sub> (50:50)                                                                                                               | 35                        | 10                          |
| NH <sub>2</sub> -MIL-53(Al) |           | 10, 15, 20,<br>25, 30, 32, 35<br>(32) | 14.5-<br>(14.7)*          | 48.0-(76.0)* | -                         | -            | -                        | -         | Single gas CO <sub>2</sub> , CH <sub>4</sub>                                                                                                                       |                           |                             |
| NH <sub>2</sub> -MIL-53(Al) |           |                                       | 14.5-<br>(14.7)*          | 42.0-(53.0)* | -                         | -            | -                        | -         | Gas mixture CO <sub>2</sub> /CH <sub>4</sub> (50:50)                                                                                                               |                           |                             |
| ZIF-8                       | Ultem®    | 10, 13 (13)                           | -                         | -            | 14.0-<br>(26.0)<br>(GPU)  | 30.0-(36.0)  | -                        | -         | Single gas CO <sub>2</sub> , N <sub>2</sub>                                                                                                                        | 25, 30,<br><u>35</u> , 45 | 6.7                         |
| ZIF-8                       |           |                                       | -                         | -            | (26.0)*<br>(GPU)          | (32.0)       | -                        | -         | Gas mixture CO <sub>2</sub> /N <sub>2</sub> (20:80)                                                                                                                | <u>25</u> , 35,<br>45     | 2.1,<br>2.8,<br><u>3.4</u>  |
| MIL-53(Al)                  | PMDA-ODA  | 5                                     | 0.30-<br>(0.21)<br>(GPU)  | 72.1-(50.5)  | 0.30-<br>(0.21)<br>(GPU)  | 34.8-(27.5)  | 0.35-<br>(0.42)<br>(GPU) | 1.1-(2.0) | Single gas He, H <sub>2</sub> , CO <sub>2</sub> , N <sub>2</sub> , CH <sub>4</sub>                                                                                 | 25                        | 6                           |



|                          |                           |                               |                          |             |                          |             |                          |                    |                                                                                                 |                                |     |
|--------------------------|---------------------------|-------------------------------|--------------------------|-------------|--------------------------|-------------|--------------------------|--------------------|-------------------------------------------------------------------------------------------------|--------------------------------|-----|
| MOF-5                    |                           |                               | 0.30-<br>(0.27)<br>(GPU) | 72.1-(56.8) | 0.30-<br>(0.27)<br>(GPU) | 34.8-(14.1) | 0.35-<br>(0.24)<br>(GPU) | 1.1-(0.9)          |                                                                                                 |                                |     |
| HKUST-1                  |                           |                               | 0.30-<br>(0.32)<br>(GPU) | 72.1-(73.6) | 0.30-<br>(0.32)<br>(GPU) | 34.8-(38.1) | 0.35-<br>(0.44)<br>(GPU) | 1.1-(1.3)          |                                                                                                 |                                |     |
| ZIF-8                    | Matrimid®                 | 10, 25 (25)                   | 10.7-<br>(23.2)          | 34-(39)     | -                        | -           | -                        | -                  | Single gas CO <sub>2</sub> , CH <sub>4</sub>                                                    | 35                             | 4.5 |
| ZIF-8                    | Matrimid®                 | 5, 10, 20, 30,<br>40 (20, 30) | 8.1-<br>(16.6)           | 35.2-(35.8) | 8.1-<br>(16.6)           | 22.4-(19.0) | 32.7-<br>(112.1)         | 4.0-(3.9)          | Single gas H <sub>2</sub> , CO <sub>2</sub> , O <sub>2</sub> , N <sub>2</sub> , CH <sub>4</sub> | 22                             | 4   |
| UiO-66                   |                           |                               | 14.4-<br>(50.4)          | 44.1-(46.1) | -                        | -           | -                        | -                  | Single gas CO <sub>2</sub> , CH <sub>4</sub>                                                    |                                |     |
|                          |                           |                               | -                        | 41.7-(42.3) | -                        | -           | -                        | -                  | Gas mixture CO <sub>2</sub> /CH <sub>4</sub> (50:50)                                            |                                |     |
| NH <sub>2</sub> -UiO-66  |                           |                               | 14.4-<br>(13.7)          | 44.1-(51.6) | -                        | -           | -                        | -                  | Single gas CO <sub>2</sub> , CH <sub>4</sub>                                                    |                                |     |
|                          |                           |                               | -                        | 41.7-(44.7) | -                        | -           | -                        | -                  | Gas mixture CO <sub>2</sub> /CH <sub>4</sub> (50:50)                                            |                                |     |
| HKUST-1                  | 6FDA-<br>ODA              | 25                            | 14.4-<br>(21.8)          | 44.1-(51.2) | -                        | -           | -                        | -                  | Single gas CO <sub>2</sub> , CH <sub>4</sub>                                                    | 35                             | 10  |
|                          |                           |                               | -                        | 41.7-(50.7) | -                        | -           | -                        | -                  | Gas mixture CO <sub>2</sub> /CH <sub>4</sub> (50:50)                                            |                                |     |
| NH <sub>2</sub> -HKUST-1 |                           |                               | 14.4-<br>(26.6)          | 44.1-(59.6) | -                        | -           | -                        | -                  | Single gas CO <sub>2</sub> , CH <sub>4</sub>                                                    |                                |     |
|                          |                           |                               | -                        | 41.7-(52.4) | -                        | -           | -                        | -                  | Gas mixture CO <sub>2</sub> /CH <sub>4</sub> (50:50)                                            |                                |     |
| UiO-67                   |                           |                               | 14.4-<br>(20.8)          | 44.1-(15.0) | -                        | -           | -                        | -                  | Single gas CO <sub>2</sub> , CH <sub>4</sub>                                                    |                                |     |
|                          |                           |                               | -                        | 41.7-(15.0) | -                        | -           | -                        | -                  | Gas mixture CO <sub>2</sub> /CH <sub>4</sub> (50:50)                                            |                                |     |
| ZIF-8                    | PBI                       | 18, 20, 29,<br>34, 59 (29)    | -                        | -           | -                        | -           | 3.7-<br>(105.4)          | 8.6-(12.3)         | Single gas H <sub>2</sub> , CO <sub>2</sub>                                                     | 25                             | 3.5 |
|                          |                           | 10, 20, 33<br>(10)            | -                        | -           | -                        | -           | 2.1-(8.9)<br>(GPU)       | 6.2-(9.5)<br>(GPU) |                                                                                                 |                                |     |
| ZIF-8                    | PBI/<br>Matrimid®         | 10, 20, 33<br>(10)            | -                        | -           | -                        | -           | (65.4)<br>(GPU)          | (12.3)<br>(GPU)    | Gas mixture H <sub>2</sub> /CO <sub>2</sub> (50:50)                                             | 25, 80,<br>120,<br>150,<br>180 | 7   |
| ZIF-8                    | 6FDA-<br>DAM:DAB<br>A 4:1 | 20                            | -                        | -           | 211.4-<br>(553)          | 21.3-(19.3) | -                        | -                  | Single gas CO <sub>2</sub> , N <sub>2</sub>                                                     | 30                             | 1.4 |
| ZIF-8                    | PBI                       | 30, 60 (30)                   | -                        | -           | -                        | -           | 4.1-<br>(82.5)           | 8.9-(12.0)         | Single gas H <sub>2</sub> , CO <sub>2</sub>                                                     | 35                             | 3.5 |
|                          |                           |                               | -                        | -           | -                        | -           | (470)                    | (26.3)             | Gas mixture<br>H <sub>2</sub> /CO <sub>2</sub> (50:50)                                          | 35, 60,<br>120,<br>180,        | 2   |

|                             |                                         |                                     |                    |             |                    |             |                    |                  |                                                                                                        |                                      |                                          |
|-----------------------------|-----------------------------------------|-------------------------------------|--------------------|-------------|--------------------|-------------|--------------------|------------------|--------------------------------------------------------------------------------------------------------|--------------------------------------|------------------------------------------|
|                             |                                         |                                     |                    |             |                    |             |                    |                  | H <sub>2</sub> /CO <sub>2</sub> /CO (49.5:49.5:1)                                                      | <u>230</u>                           |                                          |
| ZIF-7                       | Pebax®                                  | 8, 22, 34 (22)                      | 72-(111)           | 14-(30)     | 72-(111)           | 34-(97)     | -                  | -                | Single gas CO <sub>2</sub> , N <sub>2</sub> , CH <sub>4</sub>                                          | 20                                   | 6.5<br>(2.75<br>for<br>CO <sub>2</sub> ) |
| ZIF-8                       | PIM-1                                   | 13.8, 24.2,<br>32.4, 39.0<br>(39.0) | 4390-<br>(6300)    | 14.2-(14.7) | 4390-<br>(6300)    | 24.4-(18.0) | 1630-<br>(6680)    | 0.4-(1.1)        | Single gas He, H <sub>2</sub> , CO <sub>2</sub> , O <sub>2</sub> , N <sub>2</sub> ,<br>CH <sub>4</sub> | 20-22                                | 1                                        |
| HKUST-1                     |                                         |                                     | -                  | -           | -                  | -           | -                  | -                |                                                                                                        |                                      |                                          |
| FeBTC                       | P84                                     | 20                                  | -                  | -           | -                  | -           | -                  | -                | Gas mixture C <sub>2</sub> H <sub>4</sub> / C <sub>2</sub> H <sub>6</sub> (80:20)                      | -                                    | 5, 10,<br>15                             |
| MIL-53(Al)                  |                                         |                                     | -                  | -           | -                  | -           | -                  | -                |                                                                                                        |                                      |                                          |
| HKUST-1                     | P84                                     | 10, 20, 40<br>(20)                  | -                  | -           | -                  | -           | -                  | -                | Gas mixture C <sub>2</sub> H <sub>4</sub> / C <sub>2</sub> H <sub>6</sub> (80:20)                      | -                                    | 5, 10,<br>15                             |
|                             |                                         | 10, 25, 45<br>(45)                  | -                  | -           | -                  | -           | 4.1-<br>(24.5)     | 8.9-(25)         | Single gas H <sub>2</sub> , CO <sub>2</sub>                                                            | 35                                   | 3.5                                      |
| ZIF-90                      | PBI                                     | 45                                  | -                  | -           | -                  | -           | (226.9)            | (13.3)           | Gas mixture H <sub>2</sub> /CO <sub>2</sub> (50:50)                                                    | 35, 60,<br>80,<br>120,<br><u>180</u> | 7                                        |
| HKUST-1                     | PPO                                     | 10, 20, 30,<br>40, 50 (40)          | 68.7-<br>(115)*    | 16.4-(34)*  | 68.7-<br>(115)*    | 16.0-(26)*  | 75.0-<br>(119)*    | 1.1-(1.0)*       | Single gas H <sub>2</sub> , CO <sub>2</sub> , N <sub>2</sub> , CH <sub>4</sub>                         | 30                                   | -                                        |
|                             | 6FDA-<br>durene                         |                                     | 468.5-<br>(1552.9) | 15.6-(11.0) | 468.5-<br>(1552.9) | 13.4-(11.3) | 518.5-<br>(2136.6) | 1.1-(1.4)        |                                                                                                        |                                      |                                          |
| ZIF-8                       | 6FDA-<br>durene<br>(cross-<br>linked)   | 33.3                                | 0.4-<br>(23.7)     | (16.9)      | 0.4-<br>(23.7)     | (11.9)      | 52.1-<br>(283.5)   | 130.3-<br>(12.0) | Single gas H <sub>2</sub> , CO <sub>2</sub> , O <sub>2</sub> , N <sub>2</sub> , CH <sub>4</sub>        | 35                                   | 3.5                                      |
|                             | 6FDA:DSD<br>A-<br>4MPD:4,4'<br>-SDA 1:1 | 0, 5, 10, 15<br>(15)                | 57.9-<br>(66.5)    | 35.1-(36.9) | -                  | -           | 90.1-<br>(100)     | 1.6-(1.8)        |                                                                                                        |                                      |                                          |
| NH <sub>2</sub> -MIL-53(Al) | 6FDA-<br>4MPD:4,4'<br>-SDA 1:1          | 10                                  | 134-<br>(137)      | 30.2-(27.2) | -                  | -           | 169-<br>(175)      | 1.3-(1.3)        | Single gas H <sub>2</sub> , CO <sub>2</sub> , CH <sub>4</sub>                                          | 35                                   | 3                                        |

|                              |                                          |                               |                 |             |   |   |                  |           |                                                                                                              |    |                                                                                              |
|------------------------------|------------------------------------------|-------------------------------|-----------------|-------------|---|---|------------------|-----------|--------------------------------------------------------------------------------------------------------------|----|----------------------------------------------------------------------------------------------|
| NH <sub>2</sub> -MIL-101(Al) | 6FDA:DSD<br>A-<br>4MPD:4,4'<br>-SDA 1:1  | 0, 5, 10 (10)                 | 57.9-<br>(70.9) | 35.1-(41.6) | - | - | 90.1-<br>(114)   | 1.6-(1.6) |                                                                                                              |    |                                                                                              |
|                              | 6FDA-<br>4MPD:4,4'<br>-SDA 1:1           | 10                            | 134-<br>(151)   | 30.2-(29.6) | - | - | 169-<br>(191)    | 1.3-(1.3) |                                                                                                              |    |                                                                                              |
| NH <sub>2</sub> -CAU-1       | PMMA                                     | 5, 10, 15, 20,<br>25 (15)     | -               | -           | - | - | 5000-<br>(11000) | 3-(13)    | Single gas H <sub>2</sub> , CO <sub>2</sub>                                                                  | RT | 3                                                                                            |
|                              |                                          |                               | -               | -           | - | - | -                | 2-(10)*   | Gas mixture H <sub>2</sub> , CO <sub>2</sub> (-)                                                             |    |                                                                                              |
| MIL-68(Al)                   | PSF                                      | 4, 8 (8)                      | 5.4-(4.7)       | 31.1-(36.5) | - | - | -                | -         | Gas mixture CO <sub>2</sub> /CH <sub>4</sub> (50:50)                                                         | 35 | 2                                                                                            |
| HKUST-1                      | PLLA                                     | 5                             | -               | -           | - | - | -                | -         | - CO <sub>2</sub> , O <sub>2</sub>                                                                           | 23 | -                                                                                            |
| ZIF-8                        | 6FDA-<br>durene<br>(400 °C)              | 20                            | 541-<br>(1090)  | 13.1-(13.0) | - | - | -                | -         |                                                                                                              |    |                                                                                              |
|                              | 6FDA-<br>durene:DA<br>BA 9:1<br>(200 °C) | 5, 10, 15, 20,<br>30, 40 (40) | 256-<br>(779)   | 19.5-(20.9) | - | - | -                | -         | Single gas CO <sub>2</sub> , CH <sub>4</sub> , C <sub>3</sub> H <sub>6</sub> , C <sub>3</sub> H <sub>8</sub> | 35 | 10<br>(3.5<br>for<br>C <sub>3</sub> H <sub>6</sub><br>and<br>C <sub>3</sub> H <sub>8</sub> ) |
|                              | 6FDA-<br>durene:DA<br>BA 7:3<br>(400 °C) | 20                            | 429-<br>(698)   | 26.0-(25.8) | - | - | -                | -         |                                                                                                              |    |                                                                                              |
|                              | 6FDA-<br>durene:DA<br>BA 9:1<br>(400 °C) | 20, 40 (20)                   | 305-<br>(728)   | 13.8-(19.6) | - | - | -                | -         | Gas mixture CO <sub>2</sub> /CH <sub>4</sub> (50:50)                                                         | 35 | 20                                                                                           |
| NH <sub>2</sub> -MIL-53(Al)  | Matrimid®                                | 15                            | 6.2-(9.2)       | 31.0-(2.1)  | - | - | -                | -         | Single gas CO <sub>2</sub> , CH <sub>4</sub>                                                                 |    |                                                                                              |
|                              |                                          |                               | -               | 28.5-(2.1)  | - | - | -                | -         | Gas mixture CO <sub>2</sub> /CH <sub>4</sub> (50:50)                                                         |    |                                                                                              |
|                              | Ultem®                                   | 15                            | 1.5-(3.0)       | 39.5-(36.2) | - | - | -                | -         | Single gas CO <sub>2</sub> , CH <sub>4</sub>                                                                 |    |                                                                                              |
|                              |                                          |                               | -               | 31.6-(36.1) | - | - | -                | -         | Gas mixture CO <sub>2</sub> /CH <sub>4</sub> (50:50)                                                         | 35 | 10                                                                                           |
|                              | 6FDA-<br>ODA:DAM<br>1:1                  | 15, 20, 22<br>(10)            | 54.1-<br>(51.2) | 23.5-(34.1) | - | - | -                | -         | Single gas CO <sub>2</sub> , CH <sub>4</sub>                                                                 |    |                                                                                              |
|                              |                                          |                               | -               | 23.6-(31.8) | - | - | -                | -         | Gas mixture CO <sub>2</sub> /CH <sub>4</sub> (50:50)                                                         |    |                                                                                              |

|                           |                                 |                                   |                  |             |                 |          |                   |            |                                                                                                                                                                                                                                                                                     |                           |    |
|---------------------------|---------------------------------|-----------------------------------|------------------|-------------|-----------------|----------|-------------------|------------|-------------------------------------------------------------------------------------------------------------------------------------------------------------------------------------------------------------------------------------------------------------------------------------|---------------------------|----|
|                           | 6FDA-ODA:DAM<br>1:4             | 10, 15, 20<br>(15)                | 130.0-<br>(113)  | 23.2-(28.2) | -               | -        | -                 | -          | Single gas CO <sub>2</sub> , CH <sub>4</sub>                                                                                                                                                                                                                                        |                           |    |
|                           |                                 |                                   | -                | 23.6-(28.5) | -               | -        | -                 | -          | Gas mixture CO <sub>2</sub> /CH <sub>4</sub> (50:50)                                                                                                                                                                                                                                |                           |    |
|                           | 6FDA-ODA:DAM<br>1:1<br>(APTMDS) | 15, 20, 25,<br>30, 32, 35<br>(30) | 32.2-<br>(58.5)  | 18.9-(36.6) | -               | -        | -                 | -          | Single gas CO <sub>2</sub> , CH <sub>4</sub>                                                                                                                                                                                                                                        |                           |    |
|                           |                                 |                                   | -                | 20.2-(33.9) | -               | -        | -                 | -          | Gas mixture<br>CO <sub>2</sub> /CH <sub>4</sub> (10:90)<br>CO <sub>2</sub> /CH <sub>4</sub> (35:65)<br>CO <sub>2</sub> /CH <sub>4</sub> (50:50)<br>CO <sub>2</sub> /CH <sub>4</sub> (60:40)<br>CO <sub>2</sub> /CH <sub>4</sub> (80:20)<br>CO <sub>2</sub> /CH <sub>4</sub> (85:15) |                           |    |
|                           | Matrimid®                       | 15                                | 6.2-(6.7)        | 31.0-(9.4)  | -               | -        | -                 | -          | Single gas CO <sub>2</sub> , CH <sub>4</sub>                                                                                                                                                                                                                                        |                           |    |
|                           |                                 |                                   | -                | 28.5-(8.5)  | -               | -        | -                 | -          | Gas mixture CO <sub>2</sub> /CH <sub>4</sub> (50:50)                                                                                                                                                                                                                                |                           |    |
|                           | Ultem®                          | 15                                | 1.5-(1.8)        | 39.5-(43.1) | -               | -        | -                 | -          | Single gas CO <sub>2</sub> , CH <sub>4</sub>                                                                                                                                                                                                                                        |                           |    |
|                           |                                 |                                   | -                | 31.6-(42.8) | -               | -        | -                 | -          | Gas mixture CO <sub>2</sub> /CH <sub>4</sub> (50:50)                                                                                                                                                                                                                                |                           |    |
| MIL-53                    | 6FDA-ODA:DAM<br>1:1             | 20                                | 54.1-<br>(61.5)  | 23.5-(12.5) | -               | -        | -                 | -          | Single gas CO <sub>2</sub> , CH <sub>4</sub>                                                                                                                                                                                                                                        | 35                        | 10 |
|                           |                                 |                                   | -                | 23.6-(13.0) | -               | -        | -                 | -          | Gas mixture CO <sub>2</sub> /CH <sub>4</sub> (50:50)                                                                                                                                                                                                                                |                           |    |
|                           | 6FDA-ODA:DAM<br>1:4             | 25                                | 130.0-<br>(123)  | 23.2-(18.1) | -               | -        | -                 | -          | Single gas CO <sub>2</sub> , CH <sub>4</sub>                                                                                                                                                                                                                                        |                           |    |
|                           |                                 |                                   | -                | 23.6-(19.1) | -               | -        | -                 | -          | Gas mixture CO <sub>2</sub> /CH <sub>4</sub> (50:50)                                                                                                                                                                                                                                |                           |    |
|                           | 6FDA-ODA:DAM<br>1:1<br>(APTMDS) | 25                                | 32.2-<br>(76.4)  | 18.9-(8.9)  | -               | -        | -                 | -          | Single gas CO <sub>2</sub> , CH <sub>4</sub>                                                                                                                                                                                                                                        |                           |    |
|                           |                                 |                                   | -                | 20.2-(8.8)  | -               | -        | -                 | -          | Gas mixture CO <sub>2</sub> /CH <sub>4</sub> (50:50)                                                                                                                                                                                                                                |                           |    |
| TKL-107                   | Matrimid®                       | 5, 10, 20, 30<br>(20)             | 7-(17)*          | 36-(64.6)   | -               | -        | -                 | -          | Single gas CO <sub>2</sub> , CH <sub>4</sub>                                                                                                                                                                                                                                        | 25                        | 2  |
|                           |                                 |                                   | 6-(15)*          | 24-(50.3)   | -               | -        | -                 | -          | Gas mixture CO <sub>2</sub> /CH <sub>4</sub> (20:80)                                                                                                                                                                                                                                |                           |    |
| CPO-27(Mg)                | XLPEO                           | 10                                | -                | -           | 380-<br>(250)   | 22-(25)  | -                 | -          |                                                                                                                                                                                                                                                                                     | 25                        | 2  |
|                           | 6FDA-TMPDA                      | 10                                | -                | -           | 650-<br>(850)   | 14-(23)  | -                 | -          | Single gas CO <sub>2</sub> , N <sub>2</sub>                                                                                                                                                                                                                                         |                           |    |
|                           | PDMS                            | 20                                | -                | -           | 3100-<br>(2100) | 9.5-(12) | -                 | -          |                                                                                                                                                                                                                                                                                     |                           |    |
| Silica-(ZIF-8) core-shell | PSF                             | 8, 12, 16, 20,<br>32 (32)         | 11.8-<br>(73.1)* | 10.2-(5.5)* | -               | -        | 35.0-<br>(224.1)* | 3.4-(3.9)* | Gas mixture<br>H <sub>2</sub> /CO <sub>2</sub> (50:50)<br>CO <sub>2</sub> /CH <sub>4</sub> (10:90, 50:50, 90:10)                                                                                                                                                                    | 35, 60,<br>90,120,<br>150 | 2  |

|                                                                             |                 |                                              |                     |              |                     |             |                |             |                                                                                                                                 | 35, 60,<br>90, 120 |                |
|-----------------------------------------------------------------------------|-----------------|----------------------------------------------|---------------------|--------------|---------------------|-------------|----------------|-------------|---------------------------------------------------------------------------------------------------------------------------------|--------------------|----------------|
| ZIF-8                                                                       | Pebax®          | 5, 10, 15, 20,<br>25, 30, 35<br>(35)         | 351-<br>(1287)      | 8.3-(9.0)    | 351-<br>(1287)      | 33.8-(32.3) | -              | -           | Single gas<br>CO <sub>2</sub> , O <sub>2</sub> , N <sub>2</sub> , CH <sub>4</sub>                                               | RT                 | 2, 6           |
|                                                                             |                 | 5, 10, 15, 20,<br>25, 30, 35,<br>40, 50 (25) | -                   | -            | 200-<br>(900)*      | 66-(53)*    | -              | -           | Gas mixture CO <sub>2</sub> /N <sub>2</sub> (10:90)                                                                             | 25                 | 1.5            |
| MIL-53                                                                      | Matrimid®       | 5, 10, 15, 20<br>(15)                        | 6.4-<br>(12.4)      | 28.2-(51.8)  | -                   | -           | -              | -           | Single gas CO <sub>2</sub> , CH <sub>4</sub>                                                                                    | 35                 | 3              |
| ZIF-8                                                                       |                 |                                              | -                   | -            | -                   | -           | -              | -           | Gas mixture                                                                                                                     |                    |                |
| NH <sub>2</sub> -MIL-53(Al)                                                 | PSF             | 8                                            | -                   | -            | -                   | -           | -              | -           | H <sub>2</sub> /CH <sub>4</sub> (50:50)<br>O <sub>2</sub> /N <sub>2</sub> (50:50)                                               | 35                 | 2              |
| [Cd <sub>2</sub> 6FDA(H <sub>2</sub> O)] <sub>2</sub> 5<br>H <sub>2</sub> O | 6FDA-<br>ODA    | 10                                           | 20.6-<br>(37.8)     | 33.1-(44.8)  | 20.6-<br>(37.8)     | 26.4-(35.1) | -              | -           | Single gas CO <sub>2</sub> , N <sub>2</sub> , CH <sub>4</sub>                                                                   | 25                 | 2              |
| MIL-53(Al)                                                                  | PMP             | 5, 10, 15, 20,<br>25, 30, 35, 40<br>(30)     | -                   | -            | -                   | -           | 100-<br>(365)* | 0.11-(0.04) | Single gas H <sub>2</sub> , CO <sub>2</sub>                                                                                     | 30                 | 2, 4,<br>6, 8  |
| ZIF-8                                                                       | 6FDA-<br>Durene | 3, 5, 7, 10,<br>15, 20, 30<br>(30)           | 1468.3-<br>(2185.5) | 22.6-(17.1)  | 1468.3-<br>(2185.5) | 25.4-(17.0) | -              | -           | Single gas CO <sub>2</sub> , O <sub>2</sub> , N <sub>2</sub> , CH <sub>4</sub>                                                  | RT                 | 2, 6           |
|                                                                             |                 |                                              | -                   | -            | -                   | -           | -              | -           | Gas mixture CO <sub>2</sub> /N <sub>2</sub> (10:90)                                                                             | 25                 | 1.5            |
| NH <sub>2</sub> -MIL-53(Al) +<br>MSSs                                       | PSF             | 16+0, 12+4,<br>8+8, 4+12<br>(4+12)           | -                   | -            | -                   | -           | -              | -           | Gas mixture<br>O <sub>2</sub> /N <sub>2</sub> (50:50)                                                                           | 35                 | 2              |
| NH <sub>2</sub> -MIL-53(Al) +<br>MSSs                                       | Matrimid®       | 8+8, 4+12<br>(4+12)                          | -                   | -            | -                   | -           | -              | -           | H <sub>2</sub> /CH <sub>4</sub> (50:50)                                                                                         |                    |                |
| NH <sub>2</sub> -MIL-53(Al)                                                 | Matrimid®       | 15, 20, 25<br>(25)                           | 4.8-(3.9)           | 100-(107)    | -                   | -           | -              | -           |                                                                                                                                 | 0, 25,<br>35       | 3, 5,<br>9, 12 |
|                                                                             | PSF             | 15, 20, 25<br>(25)                           | 5.2-(5.4)           | 23.0-(27.5)  | -                   | -           | -              | -           | Gas mixture CO <sub>2</sub> /CH <sub>4</sub> (50:50)                                                                            | 35                 | 3              |
| NH <sub>2</sub> -MIL-101(Al)                                                | Matrimid®       | 8, 15, 25 (25)                               | 4.8-(3.0)           | 100-(98)     | -                   | -           | -              | -           |                                                                                                                                 | 0, 25,<br>35       | 3, 5,<br>9, 12 |
|                                                                             | PSF             | 8, 15, 25 (25)                               | 5.2-(8.4)           | 23.0-(28.5)  | -                   | -           | -              | -           |                                                                                                                                 | 35                 | 3              |
| ZIF-8                                                                       | 6FDA-<br>DAM    | 17, 30 (17)                                  | -                   | -            | -                   | -           | -              | -           | Single gas O <sub>2</sub> , N <sub>2</sub><br>Gas mixture C <sub>3</sub> H <sub>6</sub> , C <sub>3</sub> H <sub>8</sub> (50:50) | 35                 | 2<br>1.4       |
| ZIF-8                                                                       |                 |                                              | 9-(26)*             | 34.5-(35)*   | -                   | -           | -              | -           |                                                                                                                                 |                    |                |
| ZIF-7-8-(20)                                                                | Matrimid®       | 15                                           | 9-(20)*             | 34.5-(35.5)* | -                   | -           | -              | -           | Single gas CO <sub>2</sub> , CH <sub>4</sub>                                                                                    | 35                 | 3.45           |
| ZIF-8-ambz-(15)                                                             |                 |                                              | 9-(12)*             | 34.5-(36)*   | -                   | -           | -              | -           |                                                                                                                                 |                    |                |

|                             |                                  |                                    |               |              |             |              |              |            |                                                                                                 |    |       |
|-----------------------------|----------------------------------|------------------------------------|---------------|--------------|-------------|--------------|--------------|------------|-------------------------------------------------------------------------------------------------|----|-------|
| ZIF-8-ambz-(30)             |                                  |                                    | 9-(11)*       | 34.5-(38.5)* | -           | -            | -            | -          |                                                                                                 |    |       |
| ZIF-7-8-(20)                |                                  |                                    | 8-(19)*       | 43-(41)*     | -           | -            | -            | -          |                                                                                                 |    | 6.9,  |
| ZIF-8-ambz-(15)             |                                  |                                    | 8-(14)*       | 43-(40)*     | -           | -            | -            | -          | Gas mixture CO <sub>2</sub> /CH <sub>4</sub> (50:50)                                            | -  | 13.8, |
| ZIF-8-ambz-(30)             |                                  |                                    | 8-(11)*       | 43-(42.5)*   | -           | -            | -            | -          |                                                                                                 |    | 27.6, |
|                             |                                  |                                    |               |              |             |              |              |            |                                                                                                 |    | 41.4  |
| FeBTC                       | Matrimid®                        | 10, 20, 30                         | 14-(14)*      | 55-(35)*     | -           | -            | -            | -          | Single gas CO <sub>2</sub> , CH <sub>4</sub>                                                    | 35 | 2-40  |
|                             |                                  |                                    | 14-(8.2)*     | 22-(28)*     | -           | -            | -            | -          | Gas mixture CO <sub>2</sub> /CH <sub>4</sub> (50:50)                                            | -  | (40)  |
|                             |                                  |                                    |               |              |             |              |              |            |                                                                                                 |    | 5     |
| ZIF-8                       | PBI-BuI                          | 10, 20, 30 (30)                    | 2.3-(5.2)     | 57.0-(43.6)  | 2.3-(5.2)   | 26.8-(16.0)  | 6.2-(22.1)   | 2.7-(4.2)  |                                                                                                 |    |       |
|                             | DMPBI-BuI                        | 10, 20, 30 (30)                    | 3.8-(53.9)    | 47.2-(15.7)  | 3.8-(53.9)  | 21.7-(11.3)  | 12.8-(127.5) | 3.4-(2.4)  | Single gas He, H <sub>2</sub> , CO <sub>2</sub> , N <sub>2</sub> , CH <sub>4</sub>              | 35 | 20    |
|                             | DBzPBI-BuI                       | 10, 20 (20)                        | 25.8-(89.8)   | 15.9-(11.6)  | 25.8-(89.8) | 12.9-(14.3)  | 61.4-(180.3) | 2.4-(2.0)  |                                                                                                 |    |       |
| NH <sub>2</sub> -MIL-53(Al) | PMP                              | 5, 10, 15, 20, 25, 30, 35, 40 (30) | 96.5-(358.2)  | 8.8-(24.4)   | -           | -            | -            | -          | Single gas CO <sub>2</sub> , CH <sub>4</sub>                                                    | 30 | 2, 4, |
|                             |                                  |                                    | 80.1-(339.5)  | 8.1-(22.9)   | -           | -            | -            | -          | Gas mixture CO <sub>2</sub> /CH <sub>4</sub> (10:90)                                            |    | 6, 8  |
| MIL-53(Al)-ht               | Matrimid®                        | 33.3, 37.5 (37.5)                  | 8.4- (51)     | 39.4- (47.0) | 8.4- (51)   | 33.6- (28.3) | 25.7- (103)  | 3.1- (2.0) | Single gas H <sub>2</sub> , CO <sub>2</sub> , O <sub>2</sub> , N <sub>2</sub> , CH <sub>4</sub> | 35 | 2     |
| MIL-53(Al)-as               |                                  | 37.5                               | 8.4- (40)     | 39.4- (90.1) | 8.4- (40)   | 33.6- (95.2) | 25.7- (66.0) | 3.1- (1.7) |                                                                                                 |    |       |
| c-MOF-5                     | PEI                              | 5, 15, 25 (25)                     | 1.7- (5.4)    | 18.7- (23.4) | 1.7- (5.4)  | 16.8- (28.4) | 10.1- (28.3) | 6.0- (5.3) | Single gas H <sub>2</sub> , CO <sub>2</sub> , N <sub>2</sub> , CH <sub>4</sub>                  | 25 | 6     |
| HKUST-1                     | Ultem®                           | 10, 20, 30, 35, 40 (35)            | 1.1- (4.1)    | 36.8- (34.0) | 1.1- (4.1)* | 28.0-(28.0)* | -            | -          | Single gas CO <sub>2</sub> , O <sub>2</sub> , N <sub>2</sub> , CH <sub>4</sub>                  | 35 | 3.5   |
| HKUST-1                     | ODPA-DAM (annealed 200 °C 24 h)  | 10, 15, 20, 30, 40, 50 (40)        | 47.7- (260.7) | 29-(28)*     | -           | -            | -            | -          |                                                                                                 |    |       |
|                             | Matrimid® (annealed 200 °C 24 h) |                                    | 7.6- (24.8)   | 37.5-(37.8)  | -           | -            | -            | -          | Single gas CO <sub>2</sub> , O <sub>2</sub> , N <sub>2</sub> , CH <sub>4</sub>                  | 35 | 2     |
| ZIF-8                       | ODPA-DAM (annealed 200 °C 24 h)  | 20                                 | 47.7- (134)*  | 29-(26)*     | -           | -            | -            | -          |                                                                                                 |    |       |

|                                                                                |             |                            |                          |             |                |             |                  |           |                                                                                                                                                                                                                                    |    |                                                                                                                                                                |
|--------------------------------------------------------------------------------|-------------|----------------------------|--------------------------|-------------|----------------|-------------|------------------|-----------|------------------------------------------------------------------------------------------------------------------------------------------------------------------------------------------------------------------------------------|----|----------------------------------------------------------------------------------------------------------------------------------------------------------------|
| ZIF-71                                                                         | 6FDA-durene | 10, 20, 30<br>(20)         | 959-<br>(4006)           | 16.4-(12.8) | 959-<br>(4006) | 14.7-(12.9) | 756-<br>(2310)   | 0.8-(0.6) | Single gas H <sub>2</sub> , CO <sub>2</sub> , O <sub>2</sub> , N <sub>2</sub> , CH <sub>4</sub> ,<br>C <sub>2</sub> H <sub>4</sub> , C <sub>2</sub> H <sub>6</sub> , C <sub>3</sub> H <sub>6</sub> , C <sub>3</sub> H <sub>8</sub> | 35 | 3.5 (2<br>for<br>C <sub>2</sub> H <sub>4</sub> ,<br>C <sub>2</sub> H <sub>6</sub> ,<br>C <sub>3</sub> H <sub>6</sub><br>and<br>C <sub>3</sub> H <sub>8</sub> ) |
|                                                                                |             | 10, 20, 30<br>(20)         | 917-<br>(3435)           | 21.8-(16.0) | -              | -           | -                | -         | Gas mixture CO <sub>2</sub> /CH <sub>4</sub> (50:50)                                                                                                                                                                               | 35 | 7                                                                                                                                                              |
| [Cu <sub>2</sub> (Glu) <sub>2</sub> (μ-bpa)]·(CH <sub>3</sub> CN)              | POZ         | 5, 10, 15, 20<br>(15)      | -                        | -           | 28-<br>(11.6)* | 1-(55)*     | -                | -         | Single gas CO <sub>2</sub> , N <sub>2</sub>                                                                                                                                                                                        | -  | 3.1                                                                                                                                                            |
| [Cu <sub>2</sub> (Glu) <sub>2</sub> (μ-bpp)]·(C <sub>3</sub> H <sub>6</sub> O) |             |                            | -                        | -           | 28-<br>(16.0)* | 1-(7)*      | -                | -         |                                                                                                                                                                                                                                    |    | 0.4                                                                                                                                                            |
| MIL-53(AI)                                                                     |             |                            | 14-(24)*                 | 55-(66)*    | -              | -           | -                | -         | Single gas CO <sub>2</sub> , CH <sub>4</sub>                                                                                                                                                                                       | 35 | 2.5, 5,<br>7.5,<br>10,<br>12.5,<br>15,<br>20,<br>25,<br>30, 40                                                                                                 |
| ZIF-8                                                                          |             |                            | 14-(24)*                 | 55-(72)*    | -              | -           | -                | -         |                                                                                                                                                                                                                                    |    |                                                                                                                                                                |
| HKUST-1                                                                        | Matrimid®   | 10, 20, 30<br>(30)         | 14-(18)*                 | 55-(52)*    | -              | -           | -                | -         | Gas mixture CO <sub>2</sub> /CH <sub>4</sub> (50:50)                                                                                                                                                                               | 35 | 2.5, 5,<br>7.5,<br>10,<br>15, 20,<br>25,<br>30, 40                                                                                                             |
| MIL-53(AI)                                                                     |             |                            | 9-(18)*                  | 5-(40)*     | -              | -           | -                | -         |                                                                                                                                                                                                                                    |    |                                                                                                                                                                |
| ZIF-8                                                                          |             |                            | 9-(20)*                  | 5-(37)*     | -              | -           | -                | -         | Gas mixture CO <sub>2</sub> /CH <sub>4</sub> (50:50)                                                                                                                                                                               | 35 | 2.5, 5,<br>7.5,<br>10,<br>15, 20,<br>25,<br>30, 40                                                                                                             |
| HKUST-1                                                                        |             |                            | 9-(14)*                  | 5-(46)*     | -              | -           | -                | -         |                                                                                                                                                                                                                                    |    |                                                                                                                                                                |
| ZIF-11                                                                         | PSF         | 4.7                        | -                        | -           | -              | -           | -                | -         | -                                                                                                                                                                                                                                  | -  | -                                                                                                                                                              |
|                                                                                | PES         | 4.7                        | -                        | -           | -              | -           | -                | -         | -                                                                                                                                                                                                                                  | -  | -                                                                                                                                                              |
|                                                                                | PBI         | 16.1, 29.7,<br>39.5 (39.5) | -                        | -           | -              | -           | 17.2-<br>(464.7) | 5.0-(3.6) | Single gas H <sub>2</sub> /CO <sub>2</sub>                                                                                                                                                                                         | RT | -                                                                                                                                                              |
| b-Cu 1,4-BDC                                                                   | Matrimid®   | 8                          | 5.8-(5.2)                | 59.8-(45)   | -              | -           | -                | -         | Gas mixture CO <sub>2</sub> /CH <sub>4</sub> (50:50)                                                                                                                                                                               | 25 | 3, 4.5,<br>6, 7.5                                                                                                                                              |
| nc-Cu 1,4-BDC                                                                  |             | 8                          | 5.8-(5.0)                | 59.8-(49.4) | -              | -           | -                | -         |                                                                                                                                                                                                                                    |    |                                                                                                                                                                |
| ns-Cu 1,4-BDC                                                                  |             | 2, 4, 8 (8)                | 5.9-(2.8)                | 47.7-(88.2) | -              | -           | -                | -         |                                                                                                                                                                                                                                    |    |                                                                                                                                                                |
| ns-Cu 2,6-NDC                                                                  |             | 8                          | 5.8-(6.3)                | 59.8-(43.5) | -              | -           | -                | -         |                                                                                                                                                                                                                                    |    |                                                                                                                                                                |
| ZIF-8 100 nm                                                                   | PSF         | 5                          | 25.7-<br>(15.6)<br>(GPU) | 19.4-(28.5) | -              | -           | -                | -         | Single gas CO <sub>2</sub> , CH <sub>4</sub>                                                                                                                                                                                       | 27 | 4                                                                                                                                                              |
| ZIF-8 300 nm                                                                   |             |                            | 25.7-<br>(25.9)<br>(GPU) | 19.4-(5.8)  | -              | -           | -                | -         |                                                                                                                                                                                                                                    |    |                                                                                                                                                                |

|              |      |                       |                          |            |   |   |   |   |                                                                                           |                                     |
|--------------|------|-----------------------|--------------------------|------------|---|---|---|---|-------------------------------------------------------------------------------------------|-------------------------------------|
| ZIF-8 500 nm |      |                       | 25.7-<br>(28.1)<br>(GPU) | 19.4-(5.8) | - | - | - | - |                                                                                           |                                     |
|              |      |                       | -                        | -          | - | - | - | - | Single gas C <sub>3</sub> H <sub>8</sub> , N <sub>2</sub>                                 | - 1.5                               |
| ZIF-8        | PDMS | 2.5, 5, 10, 15,<br>20 | -                        | -          | - | - | - | - | Gas mixture C <sub>3</sub> H <sub>8</sub> /N <sub>2</sub> (10:90,<br>20:80, 30:70, 40:60) | 0.5,<br>1.5,<br>2.5,<br>3.5,<br>4.5 |

Results with \* are calculated from graphs.
